# Supplementary material
Source: publisher figshare collection journal article supplement (https://gsajournals.figshare.com/ndownloader/files/27627806)
Supplement: Supplementary file 1 [file 27627806]

## Sheet: Sheet1
Table S4. H3K9me2 at ade6+ p-values.
Element	none	RCcons	RCE	RCE clr4∆	RCE ∆Rccons
none	-
RCcons	ns	-
RCE	0.0126	0.0183	-
RCE clr4∆	ns	ns	0.0143	-
RCE ∆Rccons	0.0116	ns	0.0274	0.018	-
